# Supplementary material
Source: PubMed Central journal article supplement (PMC3081143)
Supplement: mmc2.pdf [file mmc2.pdf]

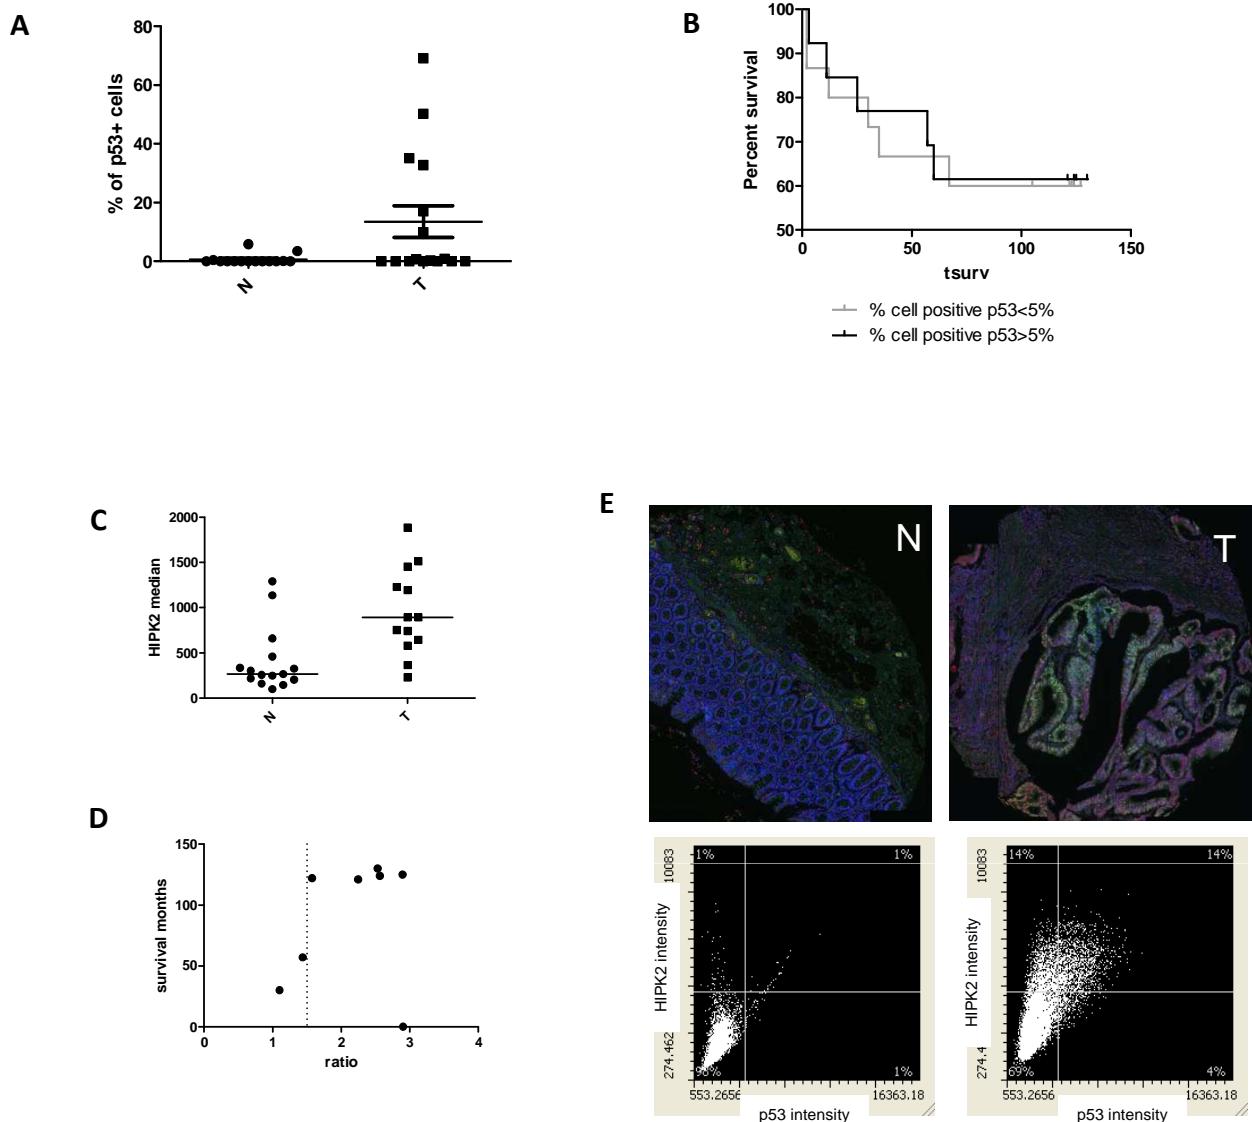

**Supplementary Fig.2 Analysis of an independent series of CRCs double labelled by immunofluorescence for p53 and HIPK2.** This TMA contains 30 CRCs, 8 of which have matched normal adjacent tissue. A) percent of p53 positive cells in normal and tumor cores. B) survival analysis of the p53 + group ( tumors with more of 5% of p53 positive cells) and the p53 negative group (less of 5%). C) expression of HIPK2 in normal and tumor cores (D) correlation plot between the tumor/normal ratio of HIPK2 expression and the survival (en months) for the 8 patients with matched tissues. E) an example of a patients with an increased expression of HIPK2 ( cores images – overlay of DAPI, p53 green, HIPK2 red channels ) and of the cytometric quantification of the signal respectively on the normal and the matched tumor core.
