# Supplementary material
Source: PubMed Central journal article supplement (PMC3081143)
Supplement: mmc3.pdf [file mmc3.pdf]

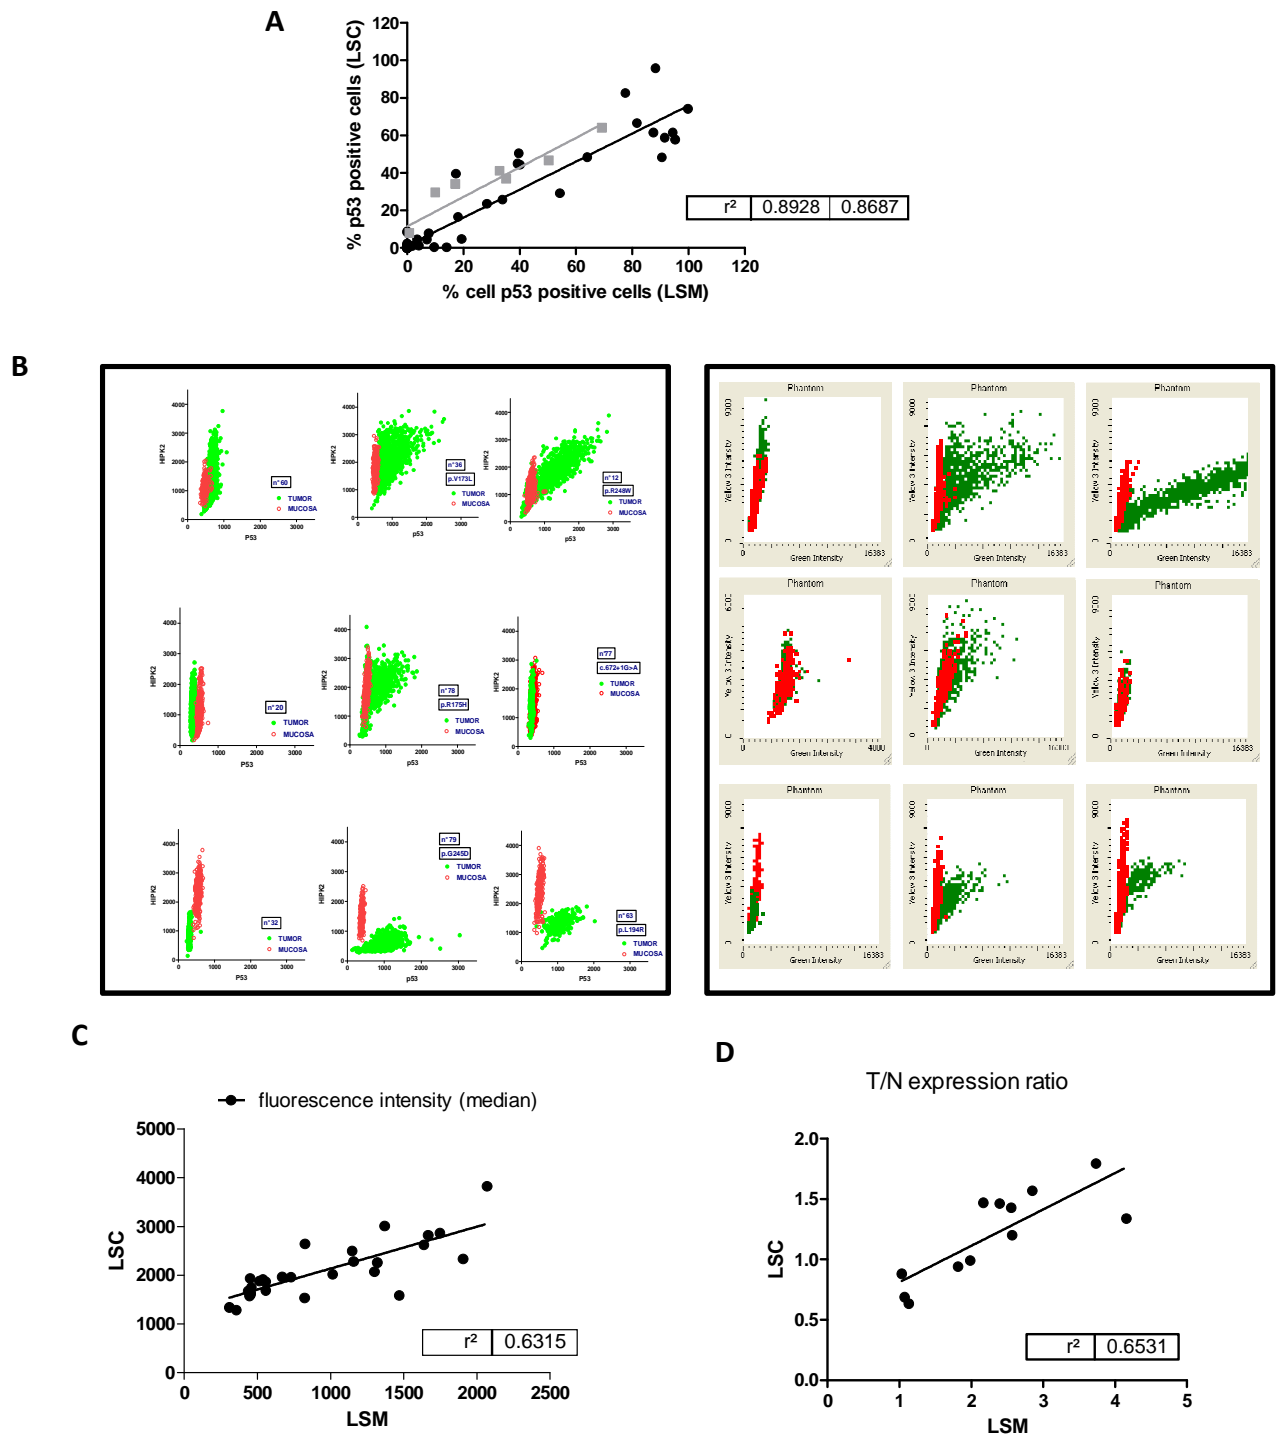

**Supplementary Fig.3 Comparison of LSM and automated LSC acquisition and analysis.**

A) correlation of the percentage of p53 positive cells in tumor cores obtained by LSM (X axis) and LSC (Y axis). Home made TMA : black circles, US Biomax TMA: gray squares. B) Examples of bi-parametric scatter plots of paired samples shown in figure 6 (left) and the same scatter plots obtained by LSC analysis; each plot shows p53 (X axis) and HIPK2 (Y axis) nuclear fluorescence intensities in tumors (green) and paired normal mucosa (red). C) Correlation plot between the medians of HIPK2 intensities obtained by LSM (X axis) and LSC (Y axis) in the home made TMA. (D) Correlation plot between the tumor/normal ratio of HIPK2 expression calculated respectively on the basis of the LSM (X axis) and the LSC (Y axis) acquisition and analyses.
