# Supplementary material
Source: PubMed Central journal article supplement (PMC3081143)

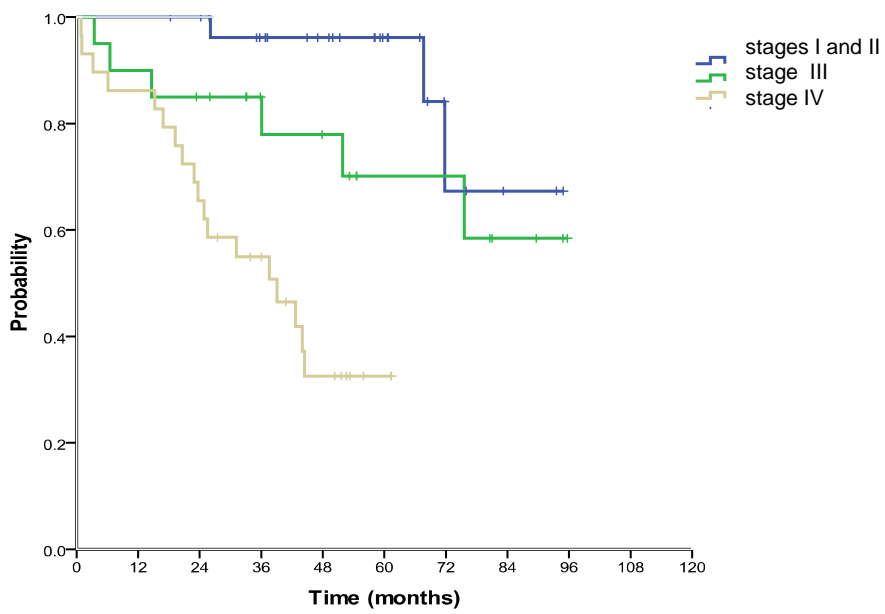

**Supplementary Fig.1 Stage-dependent survival of the CRC patients series used to build the TMA.**

Supplement: mmc1.pdf [file mmc1.pdf]
